# Supplementary material
Source: MDPI journal article supplement (https://www.mdpi.com/2071-1050/14/10/6150)
Supplement: s1 [file s1]

**Text S1. ROS–PSO algorithm:**

*Step 1: The reservoirs are numbered and grouped based on the water resource allocation network diagram and ROS, and then divided into subgroups. The algorithm parameters are prepared and the attribute data of each reservoir and the water consumption unit classified.*

*Step 2: Randomly initialise decision variables (reservoir supply and supply's increase velocity)  $x_i^{(0)}$   $v_i^{(0)}$ , evaluate the fitness of  $x_i^{(0)}$  and  $v_i^{(0)}$ , and determine the values of  $P_i^{(0)}$  and  $P_G^{(0)}$ .*

*Step 3: Update the position and velocity of the particle based on [Eq.11](#) and [Eq.12](#). Then, the satisfied degree of water supply, close degree of ecological and flow, and comprehensive benefit objective function based on [Eq.1–Eq.5](#) can be obtained.*

*Step 4: Evaluate the fitness of  $x_i^{(n+1)}$  and  $v_i^{(n+1)}$  if the performance is better (larger the value of the comprehensive benefit objective function), replace  $P_i^{(n)}$  and  $P_G^{(n)}$  by the new solution ( $P_i^{(n+1)}$  and  $P_G^{(n+1)}$ ).*

*Step 5: If  $n < N$  or  $\varepsilon < \varepsilon_{max}$ , then  $n = n + 1$ , and return to step 3; otherwise, the optimisation is terminated.*

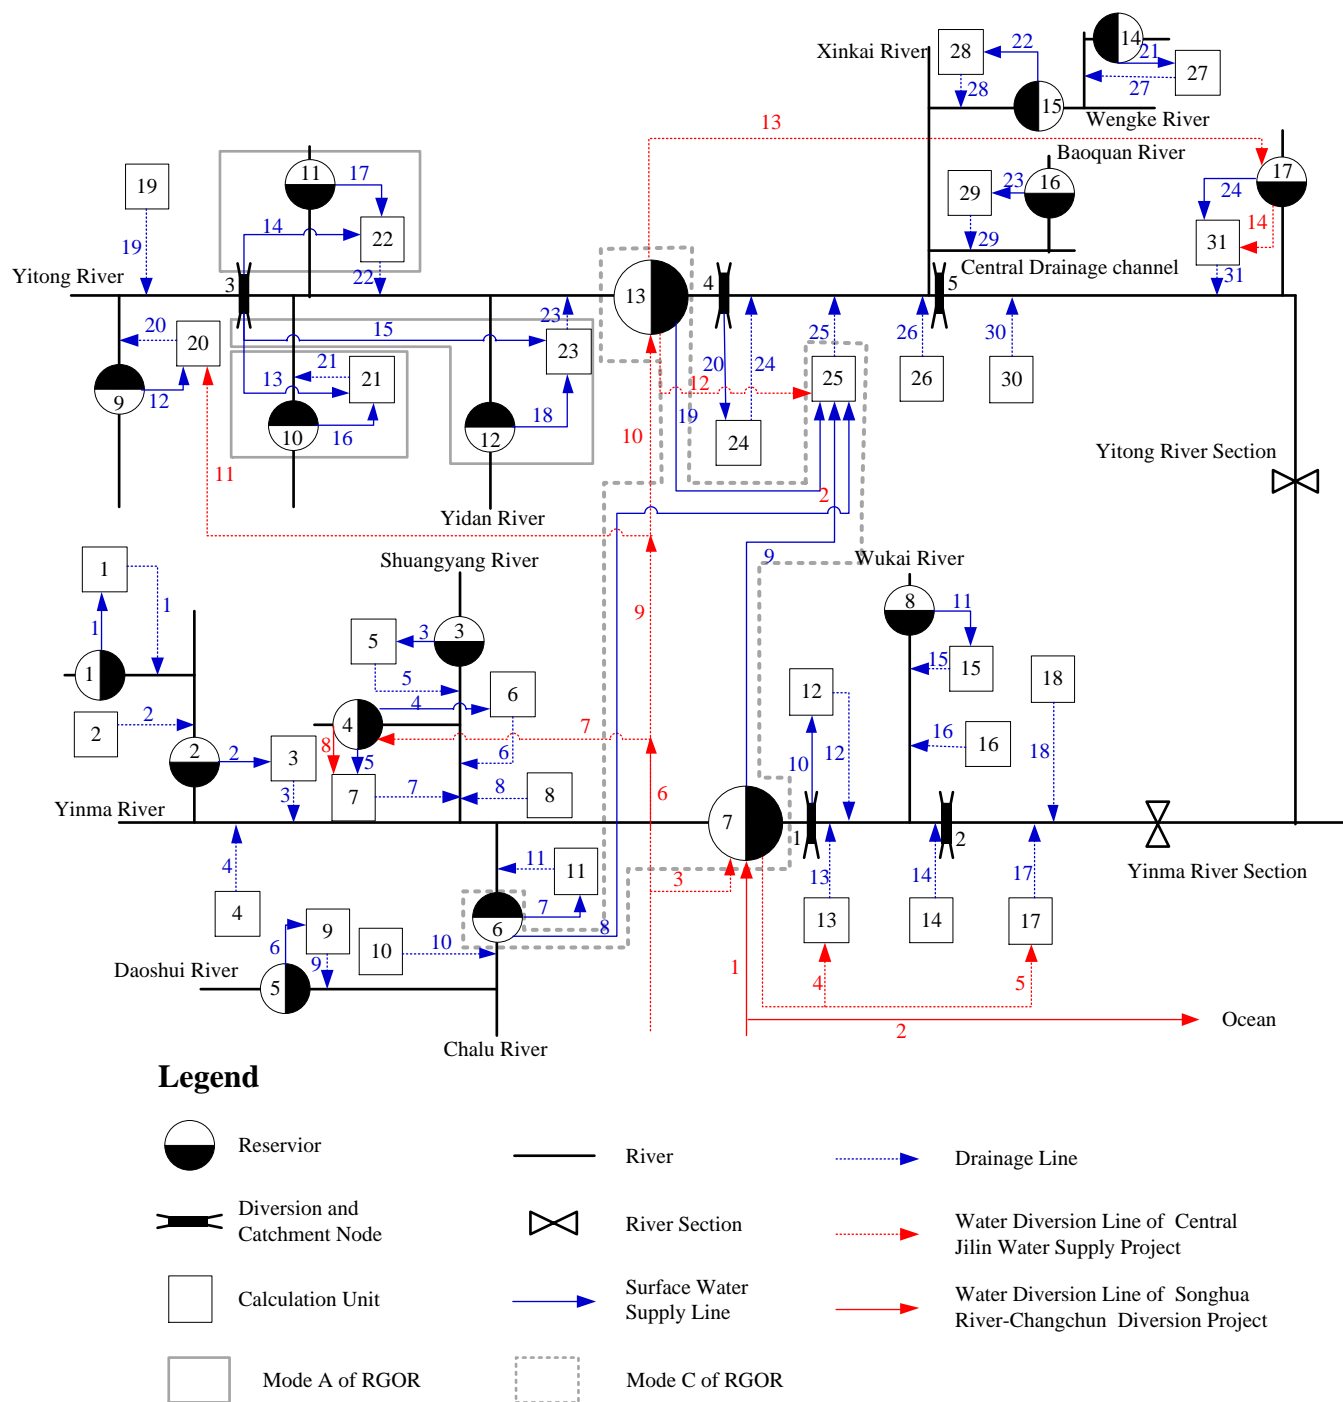

**Figure S1.** Generalised figure of reservoir group operation in YRB.

The numbers in the figure correspond to Table S2

**Table S1.** Parameters of reservoirs in YRB

| Name                   | Catchment area<br>(km <sup>2</sup> ) | Total storage<br>(10 <sup>4</sup> m <sup>3</sup> ) | Utilizable capacity<br>(10 <sup>4</sup> m <sup>3</sup> ) | Dead storage<br>(10 <sup>4</sup> m <sup>3</sup> ) | Normal water level<br>(m) | Flood control level<br>(m) |
|------------------------|--------------------------------------|----------------------------------------------------|----------------------------------------------------------|---------------------------------------------------|---------------------------|----------------------------|
| Yaji Reservoir         | 135                                  | 0.22                                               | 0.09                                                     | 0.01                                              | 312.7                     | 310.85                     |
| Huanghe Reservoir      | 784                                  | 0.36                                               | 0.22                                                     | 0.01                                              | 94.5                      | 93                         |
| Heiding Reservoir      | 54                                   | 0.15                                               | 0.05                                                     | 0.01                                              | 248.55                    | 248.05                     |
| Shuangyang Reservoir   | 221                                  | 0.76                                               | 0.21                                                     | 0.03                                              | 218.86                    | 218.62                     |
| Miaoling Reservoir     | 37                                   | 0.1                                                | 0.08                                                     | 0.01                                              | 394.5                     | 393.45                     |
| Xinxinshao Reservoir   | 845                                  | 2.65                                               | 0.94                                                     | 0.21                                              | 245.5                     | 241                        |
| Shitoukoumen Reservoir | 4944                                 | 12.64                                              | 3.84                                                     | 0.44                                              | 189                       | 188                        |

|                        |      |      |      |       |        |        |
|------------------------|------|------|------|-------|--------|--------|
| Wuyi Reservoir         | 163  | 0.44 | 0.16 | 0.05  | 216.53 | 216.53 |
| Xiaoliaoqian Reservoir | 78   | 0.3  | 0.18 | 0.05  | 234.5  | 234.5  |
| Shoushan Reservoir     | 91   | 0.19 | 0.11 | 0.01  | 293.8  | 292.7  |
| Sanlian Reservoir      | 90   | 0.16 | 0.08 | 0.01  | 247.55 | 246.6  |
| Shimenzi Reservoir     | 124  | 0.28 | 0.19 | 0.02  | 264.5  | 263.3  |
| Xinlicheng Reservoir   | 1970 | 5.75 | 3.28 | 0.15  | 219.63 | 218.83 |
| Pingyang Reservoir     | 76   | 0.17 | 0.08 | 0.02  | 226.34 | 226.1  |
| Taipingchi Reservoir   | 1706 | 2.01 | 0.52 | 0.06  | 183.73 | 183.73 |
| Gongqingtuan Reservoir | 114  | 0.11 | 0.07 | 0.01  | 184.4  | 183    |
| Liangjiazi Reservoir   | 150  | 0.14 | 0.04 | 0.006 | 172.1  | 172.1  |

**Table S2.** Identification table of generalized project of ecological operation model in YRB

| Engineering properties       | No. | Name                                                           | Identification |
|------------------------------|-----|----------------------------------------------------------------|----------------|
| Reservoir                    | 1   | Yaji Reservoir                                                 | YAJI_R         |
|                              | 2   | Huanghe Reservoir                                              | HUANGHE_R      |
|                              | 3   | Heiding Reservoir                                              | HEIDINGZ_R     |
|                              | 4   | Shuangyang Reservoir                                           | SHUANGY_R      |
|                              | 5   | Miaoling Reservoir                                             | MIAOLING_R     |
|                              | 6   | Xinxinshao Reservoir                                           | XINGXSH_R      |
|                              | 7   | Shitoukoumen Reservoir                                         | SHITOUKM_R     |
|                              | 8   | Wuyi Reservoir                                                 | WUYI_R         |
|                              | 9   | Xiaoliaoqian Reservoir                                         | XIAOLIAOQ_R    |
|                              | 10  | Shoushan Reservoir                                             | SHOUSHAN_R     |
|                              | 11  | Sanlian Reservoir                                              | SANLIAN_R      |
|                              | 12  | Shimenzi Reservoir                                             | SHIMENZI_R     |
|                              | 13  | Xinlicheng Reservoir                                           | XINLICH_R      |
|                              | 14  | Pingyang Reservoir                                             | PINGYANG_R     |
|                              | 15  | Taipingchi Reservoir                                           | TAIPINGC_R     |
|                              | 16  | Gongqingtuan Reservoir                                         | GONGQT_R       |
|                              | 17  | Liangjiazi Reservoir                                           | LIANGJIAZI_R   |
| Diversion and Catchment Node | 1   | Down Node of Shitoukoumen                                      | NKMX           |
|                              | 2   | Dehui Node                                                     | NDHUI          |
|                              | 3   | Up Node of Xinlicheng                                          | NXLCS          |
|                              | 4   | Down Node of Xinlicheng                                        | NXLCX          |
|                              | 5   | Nongan Node                                                    | NNA            |
| Calculation Unit             | 1   | Yaji Reservoir Irrigation Area                                 | UYM_RYAJI      |
|                              | 2   | Interval Between Yaji Reservoir and Huanghe Reservoir          | UYM_OYJHH      |
|                              | 3   | Huanghe Reservoir Irrigation Area                              | UYM_RHHE       |
|                              | 4   | Interval Between Huanghe Reservoir and Shitoukoumen Reservoir  | UYM_OHHKM      |
|                              | 5   | Heiding Reservoir Irrigation Area                              | UYM_RHDING     |
|                              | 6   | Shuangyang Reservoir Irrigation Area                           | UYM_RSYANG     |
|                              | 7   | Shuangyang District                                            | UYM_SHYANG     |
|                              | 8   | Shuangyang River Interval                                      | UYM_OSYANG     |
|                              | 9   | Miaoling Reservoir Irrigation Area                             | UYM_RMLING     |
|                              | 10  | Interval Between Miaoling Reservoir and Xingxingshao Reservoir | UYM_OMLXXS     |
|                              | 11  | Xingxingshao Reservoir Irrigation Area                         | UYM_RXXSH      |

| Engineering properties    | No. | Name                                                               | Identification |
|---------------------------|-----|--------------------------------------------------------------------|----------------|
|                           | 12  | Shitoukoumen Reservoir Irrigation Area                             | UYM_RSTKM      |
|                           | 13  | Jiutai City                                                        | UYM_JIUTAI     |
|                           | 14  | Interval Between Shitoukoumen Reservoir and Dehui Node             | UYM_OKMDH      |
|                           | 15  | Wuyi Reservoir Irrigation Area                                     | UYM_RWUYI      |
|                           | 16  | Wukai River Interval                                               | UYM_OWHKE      |
|                           | 17  | Dehui City                                                         | UYM_DEHUI      |
|                           | 18  | Interval Between Dehui Node and Yinma River Estuary                | UYM_ODHYMH     |
|                           | 19  | Interval Above Xinlicheng Reservoir of Yinma River                 | UYT_OXLCSH     |
|                           | 20  | Yitong County                                                      | UYT_YITONG     |
|                           | 21  | Shoushan Reservoir Irrigation Area                                 | UYT_RSHSH      |
|                           | 22  | Sanlian Reservoir Irrigation Area                                  | UYT_RSLIAN     |
|                           | 23  | Shimenzi Reservoir Irrigation Area                                 | UYT_RSHMZ      |
|                           | 24  | Xinlicheng Reservoir Irrigation Area                               | UYT_RXLICH     |
|                           | 25  | Changchun City                                                     | UYT_CHCHUN     |
|                           | 26  | Interval Between Xinlicheng Reservoir and Nongan Node              | UYT_OXLCNA     |
|                           | 27  | Pingyang Reservoir Irrigation Area                                 | UYT_RPYANG     |
|                           | 28  | Taipingchi Reservoir Irrigation Area                               | UYT_RTPCH      |
|                           | 29  | Gongqingtu Reservoir Irrigation Area                               | UYT_RGQITU     |
|                           | 30  | Interval Between Nongan Node and YiTong River Estuary              | UYT_ONAYTH     |
|                           | 31  | Nongan County                                                      | UYT_NONGAN     |
| Surface Water Supply Line | 1   | Yaji Reservoir - Yaji Reservoir Irrigation Area                    | RYJ_AYJ        |
|                           | 2   | Huanghe Reservoir - Huanghe Reservoir Irrigation Area              | RHH_AHH        |
|                           | 3   | Heiding Reservoir - Heiding Reservoir Irrigation Area              | RHD_AHD        |
|                           | 4   | Shuangyang Reservoir - Shuangyang Reservoir Irrigation Area        | RSHY_ASHY      |
|                           | 5   | Shuangyang Reservoir - Shuangyang District                         | RSHY_CYMSY     |
|                           | 6   | Xingxingshao Reservoir - Xingxingshao Reservoir Irrigation Area    | RML_AML        |
|                           | 7   | Xingxingshao Reservoir - Changchun City                            | RXXS_AXXS      |
|                           | 8   | Shitoukoumen Reservoir - Changchun City                            | RXXS_CYTCC     |
|                           | 9   | Down Node of Shitoukoumen - Shitoukoumen Reservoir Irrigation Area | RSTKM_CYTCC    |
|                           | 10  | Wuyi Reservoir - Wuyi Reservoir Irrigation Area                    | NKMX_AKM       |
|                           | 11  | Wuyi Reservoir - Wuyi Reservoir Irrigation Area                    | RWY_AWY        |
|                           | 12  | Xiaoliaoqian Reservoir - Yitong County                             | RXLQ_CYTYT     |
|                           | 13  | Up Node of Xinlicheng - Shoushan Reservoir Irrigation Area         | NXLCS_ASS      |
|                           | 14  | Up Node of Xinlicheng - Sanlian Reservoir Irrigation Area          | NXLCS_AS       |
|                           | 15  | Up Node of Xinlicheng - Shimenzi Reservoir Irrigation Area         | NXLCS_ASMZ     |
|                           | 16  | Shoushan Reservoir - Shoushan Reservoir Irrigation Area            | RSS_ASS        |
|                           | 17  | Sanlian Reservoir - Sanlian Reservoir Irrigation Area              | RSL_AS         |
|                           | 18  | Shimenzi Reservoir - Shimenzi Reservoir Irrigation Area            | RSMZ_ASMZ      |
|                           | 19  | Xinlicheng Reservoir - Changchun City                              | RXLC_CYTCC     |
|                           | 20  | Down Node of Xinlicheng - Xinlicheng Reservoir Irrigation Area     | NXLCX_AXLC     |
|                           | 21  | Pingyang Reservoir - Pingyang Reservoir Irrigation Area            | RPY_APY        |
|                           | 22  | Taipingchi Reservoir - Taipingchi Reservoir Irrigation Area        | RTPC_ATPC      |
|                           | 23  | Gongqingtu Reservoir - Gongqingtu Reservoir Irrigation Area        | RGQT_AGQT      |
|                           | 24  | Liangjiazui Reservoir - Nongan county                              | RLJZ_CYTNA     |
|                           | 1   | Shoushan Reservoir - Xinlicheng Reservoir                          | RSS_RXLC       |

| Engineering properties | No. | Name                                                                                   | Identification |
|------------------------|-----|----------------------------------------------------------------------------------------|----------------|
| Generalized River      | 2   | Sanlian Reservior - Xinlicheng Reservoir                                               | RSL_RXLC       |
|                        | 3   | Shimenzi Reservior - Xinlicheng Reservoir                                              | RSMZ_RXLC      |
|                        | 4   | Xinlicheng Reservior - Down Node of Xinlicheng                                         | RXLC_NXLCX     |
|                        | 5   | Gongqingtuan Reservior - Nongan Node                                                   | RGQT_NNA       |
|                        | 6   | Taipingchi Reservior - Nongan Node                                                     | RTPC_NNA       |
|                        | 7   | Pingyang Reservior - Taipingchi Reservior                                              | RPY_RTPC       |
|                        | 8   | Liangjiazi Reservior - Yitong River Section                                            | RLJZ_BYTH      |
|                        | 9   | Yaji Reservior - Huanghe Reservoir                                                     | RYJ_RHHE       |
|                        | 10  | Huanghe Reservoir - Shitoukoumen Reservior                                             | RHH_RSTK       |
|                        | 11  | Heiding Reservoir - Shitoukoumen Reservior                                             | RHD_RSTK       |
|                        | 12  | Shuangyang Reservoir - Shitoukoumen Reservior                                          | RSY_RSTK       |
|                        | 13  | Miaoling Reservoir - Xingxingshao Reservior                                            | RML_RXXSH      |
|                        | 14  | Xingxingshao Reservoir - Shitoukoumen Reservior                                        | RXXS_RSTKM     |
|                        | 15  | Shitoukoumen Reservoir - Down Node of Shitoukoumen                                     | RKM_NKMX       |
|                        | 16  | Wuyi Reservoir - Dehui Node                                                            | RWU_NDHUI      |
|                        | 17  | Up Node of Xinlicheng - Xinlicheng Reservoir                                           | NXLCS_RXLC     |
|                        | 18  | Xinlicheng Reservoir - Down Node of Xinlicheng                                         | RXLC_NXLCX     |
|                        | 19  | Down Node of Xinlicheng - Nongan Node                                                  | NXLCX_NNA      |
|                        | 20  | Nongan Node - Yitong River Section                                                     | NNA_BYTH       |
|                        | 21  | Yitong River Section - Ocean                                                           | BYTH_SEA       |
|                        | 22  | Down Node of Shitoukoumen - Dehui Node                                                 | NKMX_NDHUI     |
|                        | 23  | Dehui Node - Yinma River Section                                                       | NDH_BYMH       |
|                        | 24  | Yinma River Section - Ocean                                                            | BYMH_SEA       |
| Water Diversion Line   | 1   | Songhua River - Changchun Diversion Project - Shitoukoumen Reservior                   | DYSN_RSTK      |
|                        | 2   | Songhua River - Changchun Diversion Project - Ocean                                    | DYSN_SEA       |
|                        | 3   | Central Jilin Water Supply Project - Shitoukoumen Reservior                            | DZBYN_RSTK     |
|                        | 4   | Shitoukoumen Reservior - Jiutai City                                                   | DRSTK_YMJT     |
|                        | 5   | Shitoukoumen Reservior - Dehui City                                                    | DRSTK_YMDH     |
|                        | 6   | Central Jilin Water Supply Project - Shuangyang Water Diversion Project                | DZBYN_SYFS     |
|                        | 7   | Shuangyang Water Diversion Project - Shuangyang Reservoir                              | DSYFS_RSY      |
|                        | 8   | Shuangyang Reservoir - Shuangyang District                                             | DRSY_YMSY      |
|                        | 9   | Shuangyang Water Diversion Project - Xinlicheng Water Diversion Project                | DSYFS_XLCF     |
|                        | 10  | Xinlicheng Water Diversion Project - Xinlicheng Reservoir                              | DXLCF_RXLC     |
|                        | 11  | Xinlicheng Water Diversion Project - Yitong County                                     | DXLCF_YTYT     |
|                        | 12  | Xinlicheng Reservoir - Changchun City                                                  | DRXLC_YTCC     |
|                        | 13  | Xinlicheng Reservoir - Liangjiazi Reservoir                                            | DRXLC_RLJZ     |
|                        | 14  | Liangjiazi Reservoir - Nongan County                                                   | DRLJZ_YTNA     |
| Drainage Line          | 1   | Yaji Reservoir Irrigation Area - Huanghe Reservoir                                     | OYJ_RHH        |
|                        | 2   | Interval Between Yaji Reservoir and Huanghe Reservoir - Huanghe Reservoir              | OYJHH_RHH      |
|                        | 3   | Huanghe Reservoir Irrigation Area - Shitoukoumen Reservoir                             | OHH_RSTKM      |
|                        | 4   | Interval Between Huanghe Reservoir and Shitoukoumen Reservoir - Shitoukoumen Reservoir | OHHKM_RKM      |
|                        | 5   | Heiding Reservoir Irrigation Area - Shitoukoumen Reservoir                             | OHD_RSTKM      |
|                        | 6   | Shuangyang Reservoir Irrigation Area - Shitoukoumen Reservoir                          | OSY_RSTKM      |
|                        | 7   | Shuangyang District - Shitoukoumen Reservoir                                           | OYMSY_RKM      |
|                        | 8   | Heiding Reservoir Irrigation Area - Shitoukoumen Reservoir                             | OSYA_RSTKM     |

| Engineering properties | No. | Name                                                                                    | Identification |
|------------------------|-----|-----------------------------------------------------------------------------------------|----------------|
|                        | 9   | Miaoling Reservoir Irrigation Area - Xingxingshao Reservoir                             | OML_RXXS       |
|                        | 10  | Interval Between Miaoling Reservoir and Xingxingshao Reservoir - Xingxingshao Reservoir | OMLXX_RXXS     |
|                        | 11  | Xingxingshao Reservoir Irrigation Area - Shitoukoumen Reservoir                         | OXXS_RSTKM     |
|                        | 12  | Shitoukoumen Reservoir Irrigation Area - Dehui Node                                     | OSTKM_NDH      |
|                        | 13  | Jiutai City - Dehui Node                                                                | OYMJT_NDH      |
|                        | 14  | Interval Between Shitoukoumen Reservoir and Dehui Node - Dehui Node                     | OKMDH_NDH      |
|                        | 15  | Wuyi Reservoir Irrigation Area - Dehui Node                                             | OWY_NDH        |
|                        | 16  | Wukai River Interval - Dehui Node                                                       | OWHA_NDH       |
|                        | 17  | Dehui City - Yinma River Section                                                        | OYMDH_BYMH     |
|                        | 18  | Interval Between Dehui Node and Yinma River Estuary - Yinma River Section               | ODHYM_BYMH     |
|                        | 19  | Interval Above Xinlicheng Reservoir of Yinma River - Xinlicheng Reservoir               | OXLCS_RXLC     |
|                        | 20  | Yitong County - Up Node of Xinlicheng                                                   | OYTYT_NXLC     |
|                        | 21  | Shoushan Reservoir Irrigation Area - Xinlicheng Reservoir                               | OSS_RXLC       |
|                        | 22  | Sanlian Reservoir Irrigation Area - Xinlicheng Reservoir                                | OSL_RXLC       |
|                        | 23  | Shimenzi Reservoir Irrigation Area - Xinlicheng Reservoir                               | OSMZ_RXLC      |
|                        | 24  | Xinlicheng Reservoir Irrigation Area - Nongan Node                                      | OXLC_NNA       |
|                        | 25  | Changchun City - Nongan Node                                                            | OYTCC_NNA      |
|                        | 26  | Interval Between Xinlicheng Reservoir and Nongan Node - Nongan Node                     | OXLNA_NNA      |
|                        | 27  | Pingyang Reservoir Irrigation Area - Taipingchi Reservoir                               | OPY_RTPC       |
|                        | 28  | Taipingchi Reservoir Irrigation Area - Nongan Node                                      | OTPC_NNA       |
|                        | 29  | Gongqingtu Reservoir Irrigation Area - Nongan Node                                      | OGQT_NNA       |
|                        | 30  | Interval Between Nongan Node and YiTong River Estuary - Yitong River Section            | ONAYT_BYTH     |
|                        | 31  | Nongan County - Yitong River Section                                                    | OYTNA_BYTH     |

**Table S3.** Prediction of annual water demand at different levels in YRB

| Water unit | No. in Fig.S1 | Classification  | Water demand in 2015<br>(10 <sup>4</sup> m <sup>3</sup> ) |       | Water demand in 2030<br>(10 <sup>4</sup> m <sup>3</sup> ) |        |
|------------|---------------|-----------------|-----------------------------------------------------------|-------|-----------------------------------------------------------|--------|
| CC         | 25            | Urban           | 43096                                                     | 58933 | 85504                                                     | 118558 |
| NC         | 31            |                 | 3280                                                      |       | 7153                                                      |        |
| YC         | 20            |                 | 1790                                                      |       | 3453                                                      |        |
| SD         | 7             |                 | 1445                                                      |       | 3141                                                      |        |
| JC         | 13            |                 | 5249                                                      |       | 11014                                                     |        |
| DC         | 17            |                 | 4073                                                      |       | 8293                                                      |        |
| SsRIA      | 21            | Irrigation area | 1695                                                      | 38478 | 1544                                                      | 35760  |
| SIRIA      | 22            |                 | 171                                                       |       | 156                                                       |        |
| SmRIA      | 23            |                 | 843                                                       |       | 769                                                       |        |
| PRIA       | 27            |                 | 7                                                         |       | 6                                                         |        |
| XRIA       | 24            |                 | 41                                                        |       | 37                                                        |        |
| TRIA       | 28            |                 | 964                                                       |       | 829                                                       |        |
| GRIA       | 29            |                 | 99                                                        |       | 90                                                        |        |
| YRIA       | 1             |                 | 796                                                       |       | 743                                                       |        |
| HhRIA      | 3             |                 | 832                                                       |       | 777                                                       |        |
| MRIA       | 9             |                 | 1001                                                      |       | 935                                                       |        |
| SyRIA      | 6             |                 | 1614                                                      |       | 1509                                                      |        |

|              |    |                |               |               |               |               |
|--------------|----|----------------|---------------|---------------|---------------|---------------|
| HdRIA        | 5  |                | 443           |               | 414           |               |
| XRIA         | 11 |                | 7483          |               | 6978          |               |
| StRIA        | 12 |                | 21843         |               | 20369         |               |
| WRIA         | 15 |                | 647           |               | 604           |               |
| IAXRYR       | 19 | River interval | 6207          | 83600         | 7957          | 116954        |
| IBXRNN       | 26 |                | 15455         |               | 24088         |               |
| IBNNYRE      | 30 |                | 13223         |               | 19891         |               |
| IBYRHR       | 2  |                | 3245          |               | 4210          |               |
| IBHRSR       | 4  |                | 12825         |               | 14798         |               |
| IBMRXR       | 10 |                | 3946          |               | 4409          |               |
| SRI          | 8  |                | 5600          |               | 7638          |               |
| WRI          | 16 |                | 4111          |               | 4890          |               |
| IBStRDN      | 14 |                | 14074         |               | 24061         |               |
| IBDNYRE      | 18 |                | 4914          |               | 5011          |               |
| <b>Total</b> |    |                | <b>181011</b> | <b>181011</b> | <b>271272</b> | <b>271272</b> |
